# Supplementary material for: Conductive graphene-based E-textile for highly sensitive, breathable, and water-resistant multimodal gesture-distinguishable sensors
Source: Royal Society of Chemistry journal article supplement (doi:10.1039/d0ta04915h), 2020-01-01
Supplement: d0ta04915h2.pdf [file d0ta04915h2.pdf]

## **Supporting Information**

### **Conductive Graphene-Based E-textiles for Highly Sensitive, Breathable, and Water-Resistant Multimodal Gesture-Distinguishable Sensor**

Xurui Hu<sup>1,#</sup>, Tao Huang<sup>2,#</sup>, Zhiduo Liu<sup>3</sup>, Gang Wang<sup>1,5,\*</sup>, Da Chen<sup>1</sup>, Qinglei Guo<sup>4</sup>, Siwei Yang<sup>2</sup>, Zhiwen Jin<sup>6</sup>, Jong-Min Lee<sup>5,\*</sup>, and Guqiao Ding<sup>1,2,\*</sup>

<sup>1</sup>Department of Microelectronic Science and Engineering, School of Physical Science and Technology, Ningbo University, Ningbo 315211, P. R. China.

E-mail: gangwang@nbu.edu.cn

<sup>2</sup>State Key Laboratory of Functional Materials for Informatics, Shanghai Institute of Microsystem and Information Technology, Chinese Academy of Sciences, Shanghai 200050, P. R. China.

E-mail: gqding@mail.sim.ac.cn

<sup>3</sup>State Key Laboratory of Integrated Optoelectronics, Institute of Semiconductors, Chinese Academy of Sciences, Beijing 100083, P. R. China.

<sup>4</sup>School of Microelectronics, Shandong University, Jinan 250100, P. R. China.

<sup>5</sup>School of Chemical and Biomedical Engineering, Nanyang Technological University, Singapore.

E-mail: JMLLEE@ntu.edu.sg, gangwang@nbu.edu.cn

<sup>6</sup>School of Physical Science and Technology & Key Laboratory for Magnetism and Magnetic Materials (MoE), Lanzhou University, Lanzhou 730000, P. R. China.

<sup>#</sup>X.H. and T.H. contribute equally to this work.

**Preparation of graphene:** a reaction mixture composed of 1 g graphite, 10 g  $\text{Na}_2\text{S}_2\text{O}_8$ , and 90 ml sulfuric acid was kept at room temperature for 10 min under constant stirring. Then, the mixture was transferred to a kettle pre-heated to 80 °C and held for 30 min under constant stirring (350 rpm). The product was isolated by filtration, and the filtrated solution was collected for the next graphite exfoliation cycle. After rinsing thoroughly with water and ethanol, the product was dried at 50 °C in ambient air for 5 h to obtain a fluffy powder. This was then dispersed in NMP under 2 hours of ultrasonic treatment to get the 20 mg/ml graphene/NMP slurry.

**The reaction process of MTCS-PMS:**

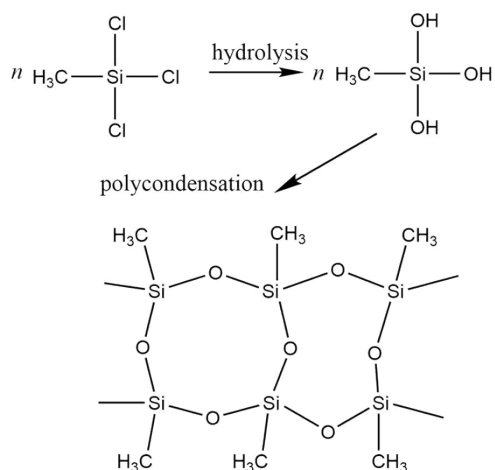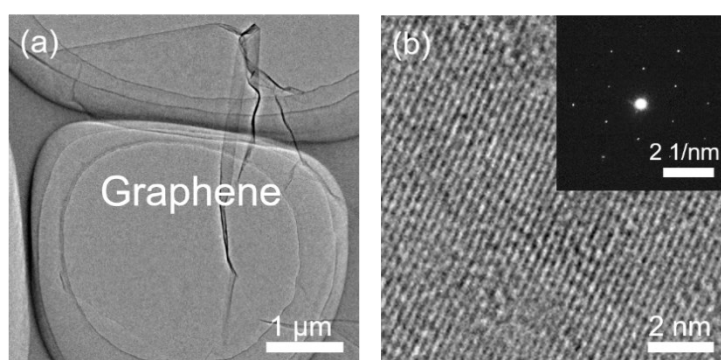

Fig. S1 (a) TEM image of graphene. (b) HR-TEM images showing lattice fringe of graphene, illustration is the selected area electron diffraction pattern of graphene.

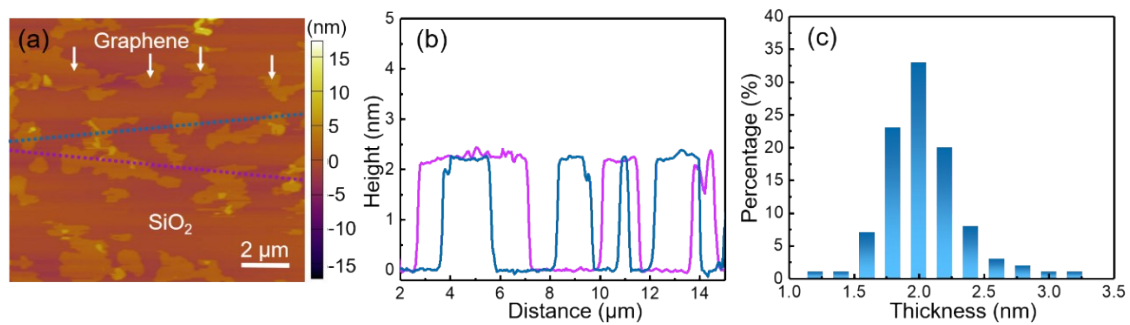

Fig. S2 (a) AFM images of graphene. (b) Thickness profile along the line in (a). (c) Flake thickness distribution of graphene.

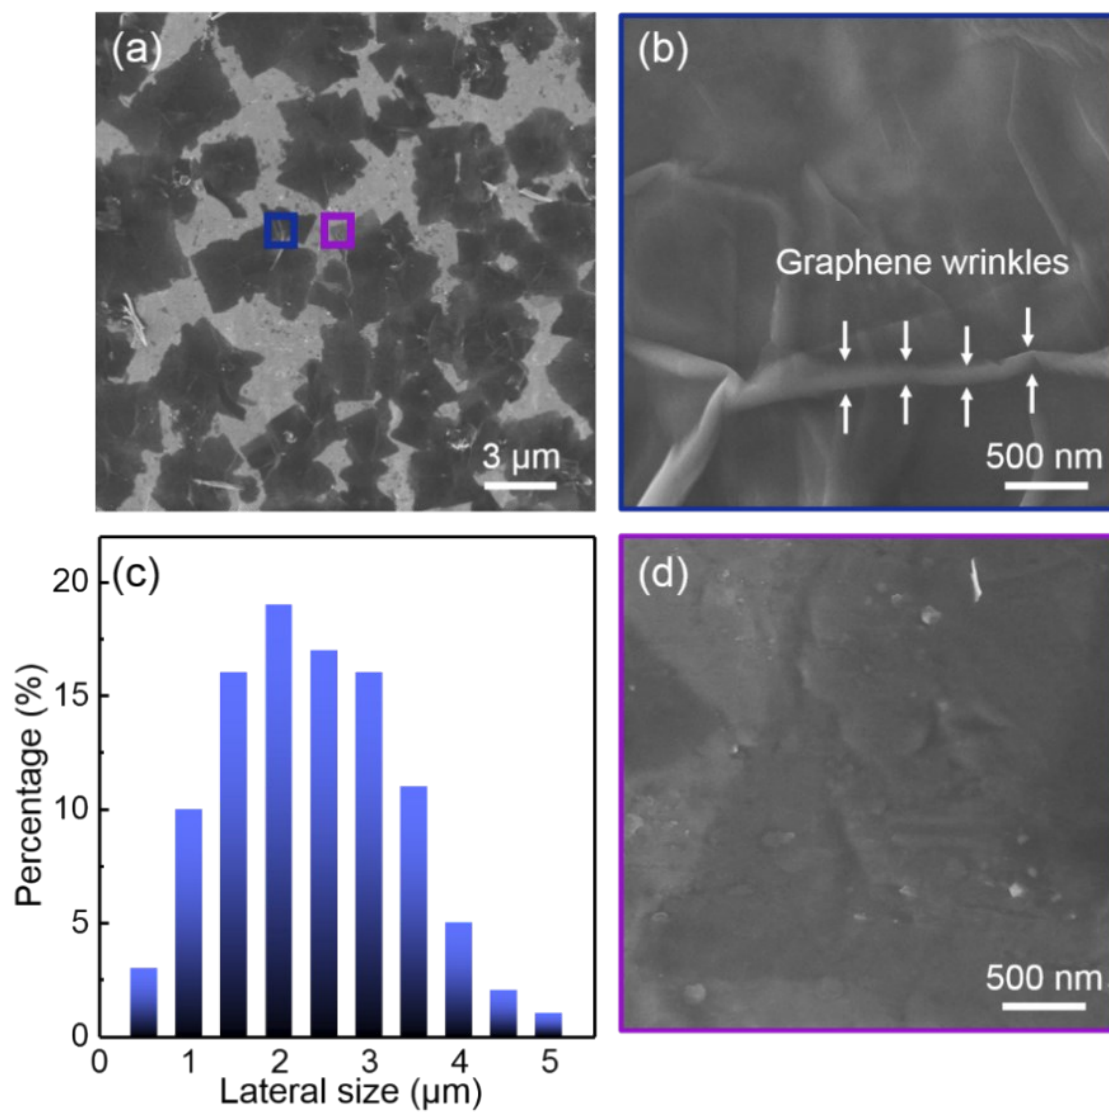

Fig. S3 (a) SEM image of graphene flakes. (b, d) partially magnified image from (a). (c) Flake size distribution of graphene.

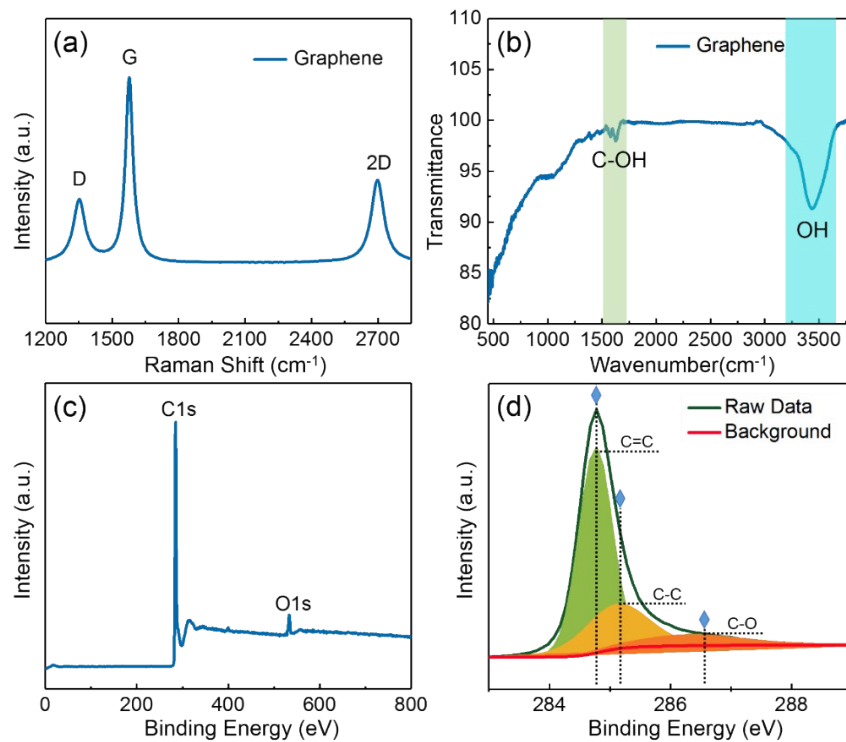

Fig. S4 Raman (a) and FT-IR (b) of graphene, XPS (c, d) results of graphene and C 1s peak analysis are showing the high-quality of graphene and less oxygen groups.

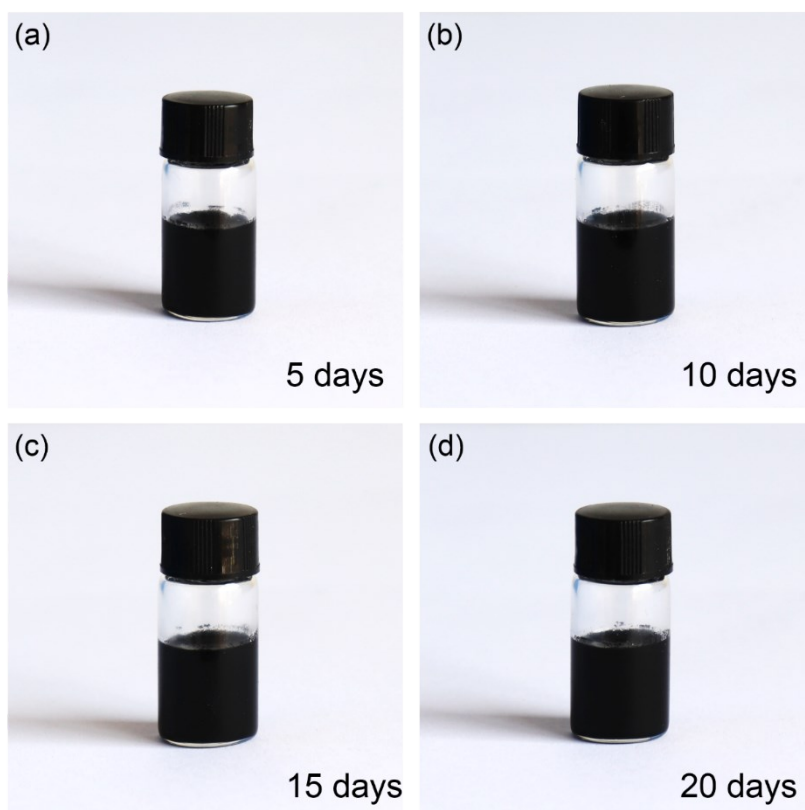

Fig. S5 (a-d) Graphene dye solution standing still for 5-20 days. After 20 days' settling down, no clear delamination or sediment in the solution was observed, indicating excellent dispersibility of graphene.

**Regulation of copper content:** it is worth mentioning that the optimum Cu content is about 0.4 (weight ratio to the solute) as shown in **Fig. S6 (a)**. With the increase of Cu content to 0.4, the sheet resistance of fabric would drop quickly. After that, more Cu content wouldn't bring a quick drop of resistance. However, if the ratio of Cu is too high (over 1), the graphene-based coatings will be easily brittle and delaminated, which cannot guarantee the integrity and mechanical stability of the device. Compared with the optimum ratio of Cu and graphene, the mechanical treating of graphene-based E-textiles under higher Cu content will result in graphene sheets delaminated, as shown in **Figs. S6 (b-c)**. The magnified SEM image shows the shape and diameter of graphene fiber (the optimum the ratio of Cu and graphene) remain the same after mechanically treated, as shown in **Fig. S6 (d)**, and no coating layer exfoliation was observed. However, under higher Cu content, the shape and diameter of graphene fiber (**Fig. S6 (e)**) showing the presence of micrometer-sized patches. If the ratio of Cu is too low (less than 0.2), the fabric will be not conductive enough, which brings higher demand to the test equipment and decreases the precision of motion distinguishing.

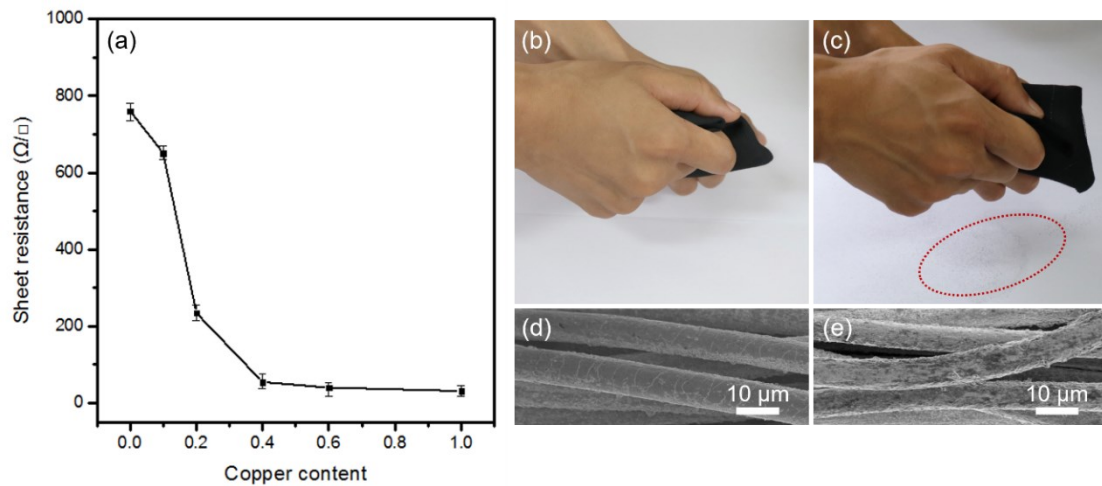

Fig. S6 (a) The sheet resistance of fabric as a function of the ratio of Cu. (b) A real image demonstrating the stability of coatings of graphene-based E-textiles with mechanical treatment under the optimum ratio of Cu and graphene. (c) A real image demonstrating the stability of coatings of graphene-based E-textiles with mechanical treatment under the high the ratio of Cu and graphene. (d) The magnified SEM image of the connection between graphene sheet and fibers with mechanical treatment from a real image (b). (e) The magnified SEM image of the connection between graphene sheet

and fibers with mechanical treatment from a real image (c).



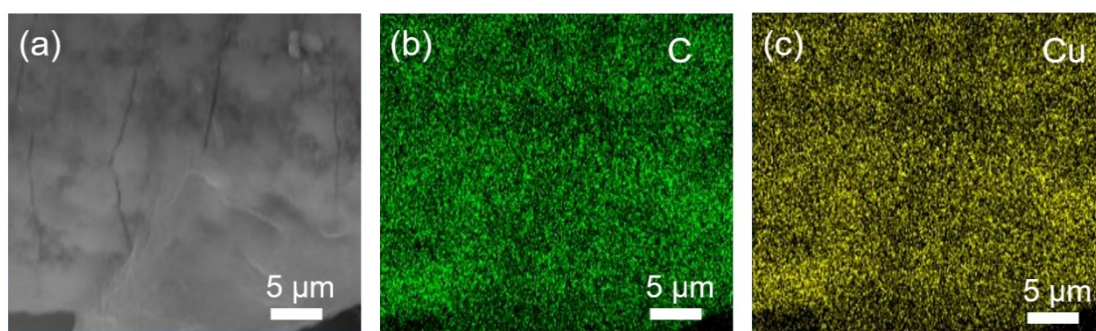

Fig. S7 Uniformity of hybrid Cu particles Functionalized graphene textiles. (a) SEM image of the hybrid architecture. EDS elemental maps of (b) C, and (c) Cu in the hybrid architecture.

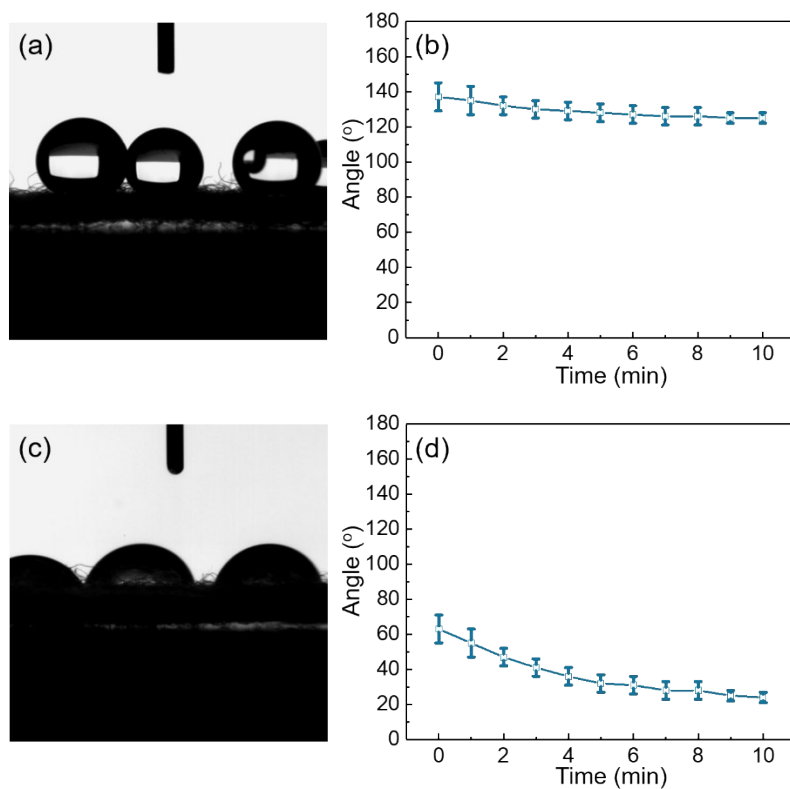

Fig. S8 (a) A plurality of water droplets are continuously dropped on the graphene E-textile. (b) The contact angle change on the graphene E-textile was within 10 minutes. (c) A plurality of water droplets are continuously dropped on the original textile. (d) The contact angle change on the original textile was within 10 minutes.

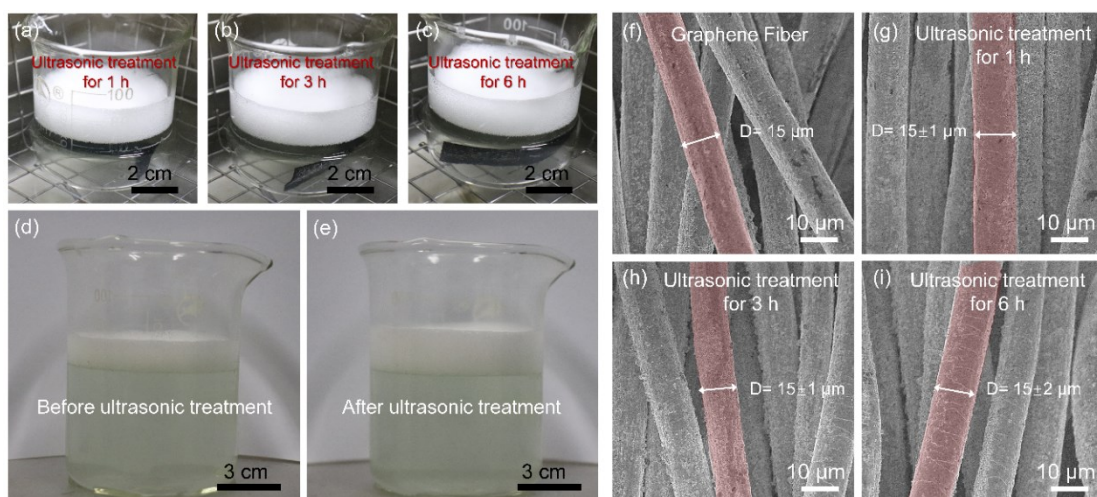

Fig. S9 The graphene-based E-textiles with the ultrasonic washing process. (a) After ultrasonic washing in the detergent for 1 hour, (b) after ultrasonic washing in the detergent for 3 hours, (c) after ultrasonic washing in the detergent for 6 hours. (d and e) Comparing the changes in detergent before and after ultrasonic cleaning. SEM images of the graphene-based E-textiles before ultrasonic washing (f), after 1 hour (g), after 3 hours (h), and after 6 hours (i) of ultrasonic washing.

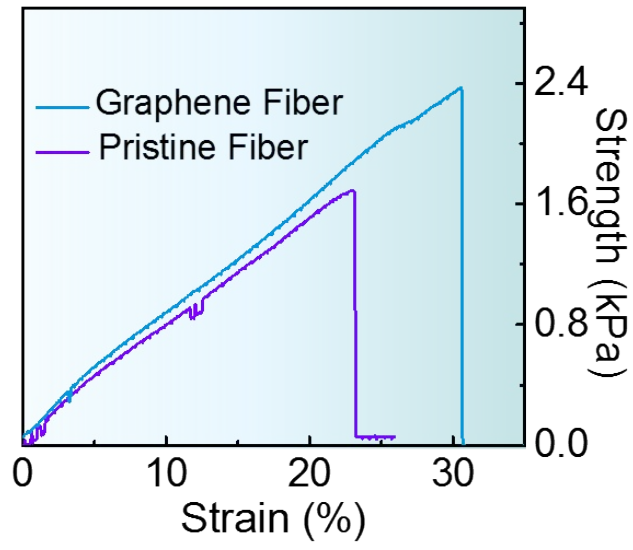

Fig S10. The strength-strain curve of fabric.

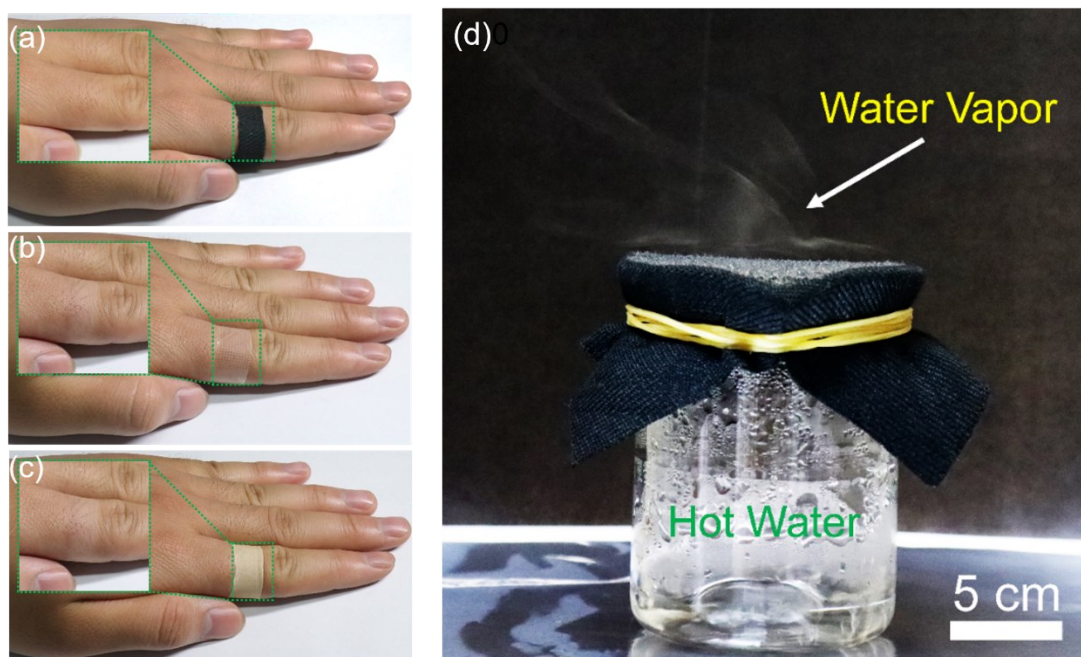

Fig. S11 (a) Graphene-based E-textiles, (b) medical polymer, and (c) the silicone film bundled on the finger for 48 hours to assess wearability and comfort. (d) A real image demonstrating the excellent breathability and air permeability properties of graphene-based E-textiles.

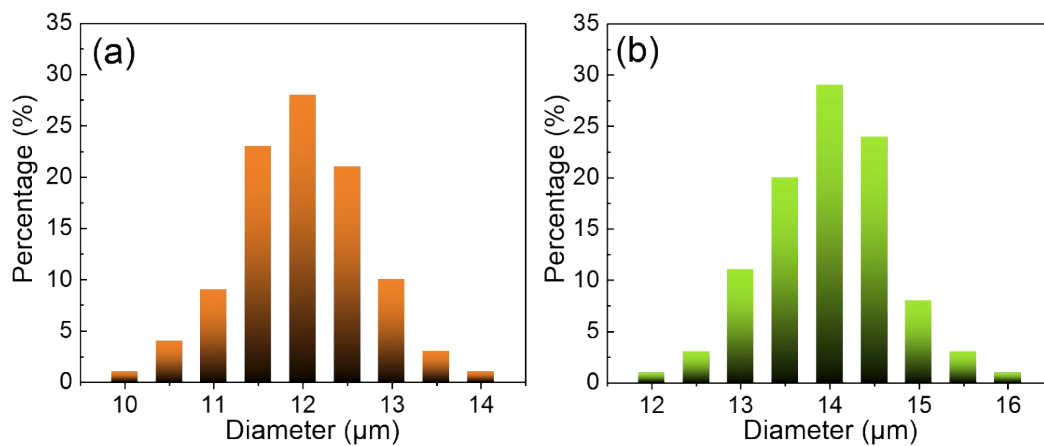

Fig. S12 (a) Diameter distribution of original fabric fibers. (b) Diameter distribution of graphene E-textile fibers.

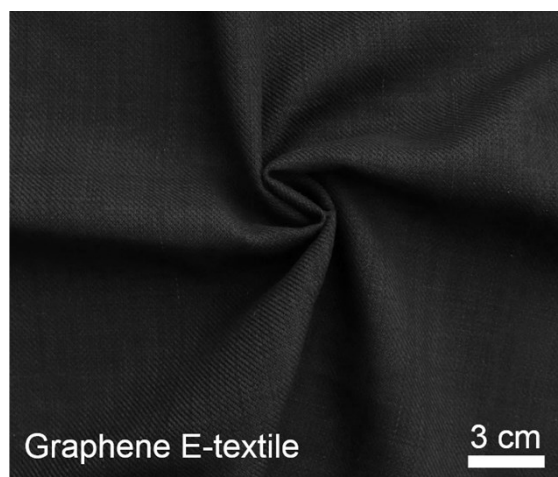

Fig. S13 Optical image of graphene E-textile, the same flexibility as original textiles.

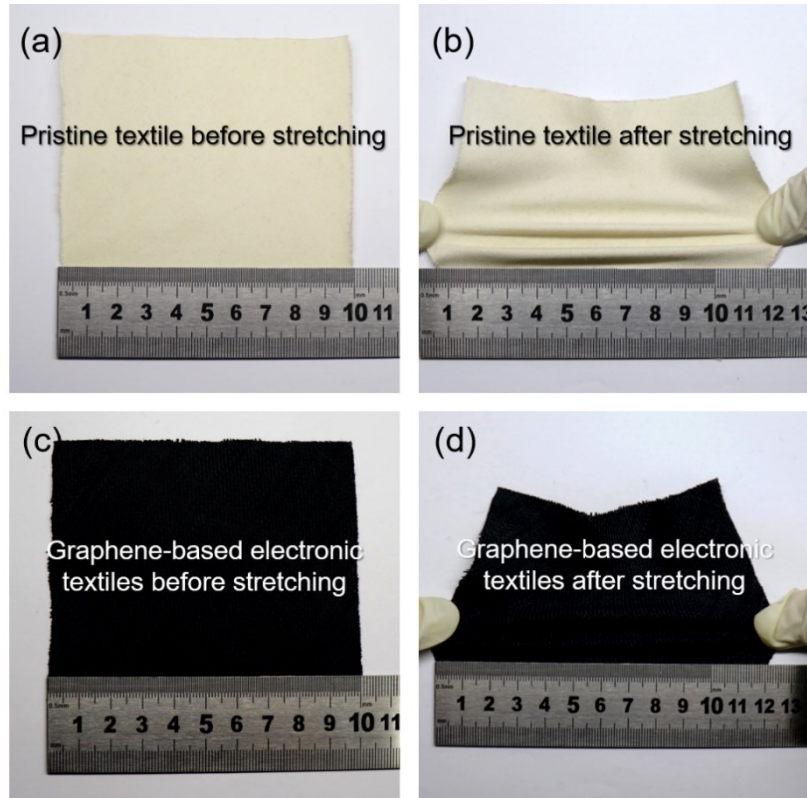

Fig. S14 (a) A real image of the pristine textile before stretching. (b) A real image of the pristine textile after stretching. (c) A real image of the graphene-based E-textiles before stretching. (d) A real image of the graphene-based E-textiles after stretching.



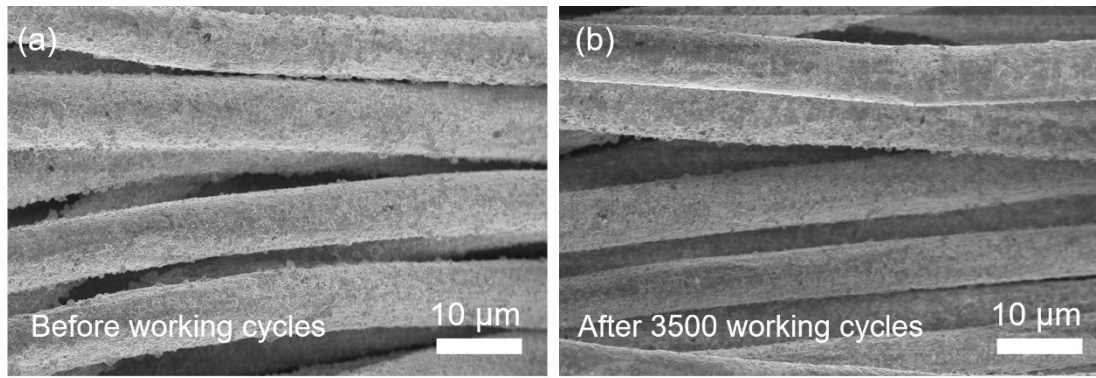

Fig. S15 The magnified SEM images of the shape and diameter of graphene-based E-textiles (a) before and (b) after 3500 working cycles.

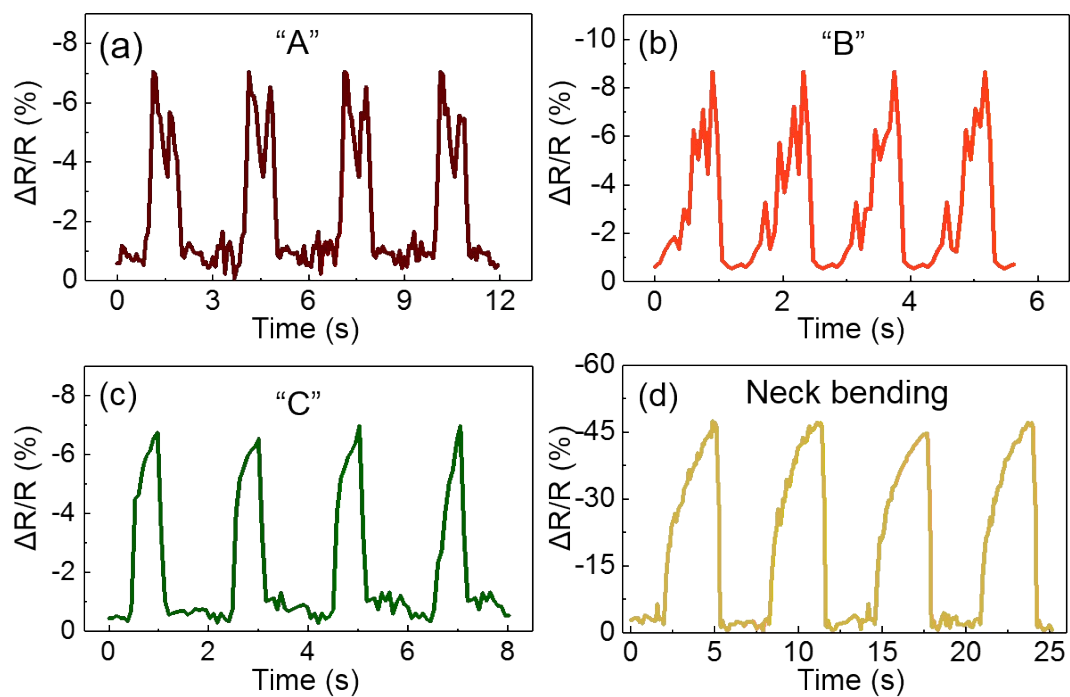

Fig. S16 (a, b and c) The relative resistance changes of the different English alphabets with hand-writing. (d) The relative resistance changes of the neck bending.

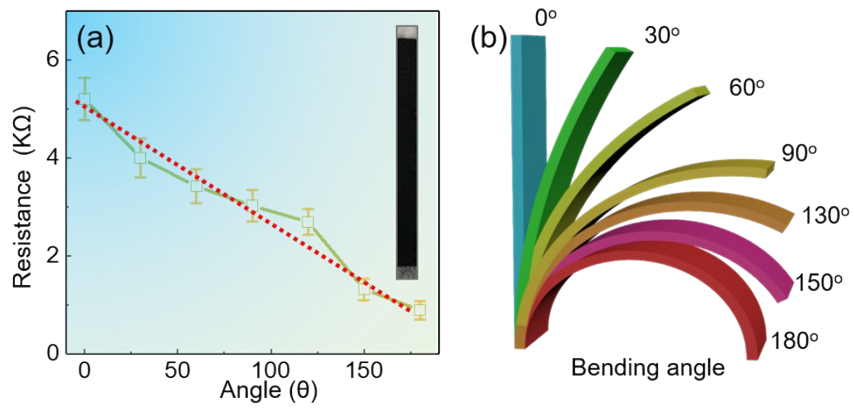

Fig. S17 (a) Graphene E-textile bending sensors change resistance during bending, the illustration shows a bend sensor. (b) A schematic diagram of the bending angle.

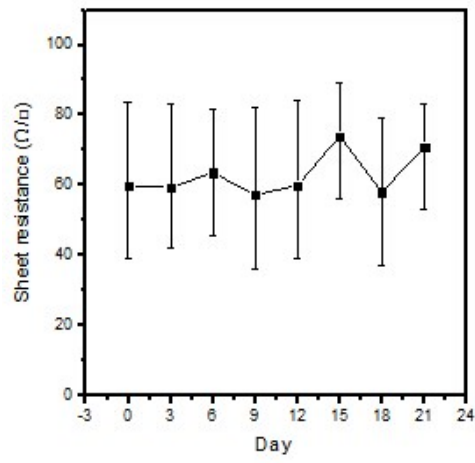

Fig. S18 The warm stability assessment of graphene-based E-textiles under 60 °C for various time durations.

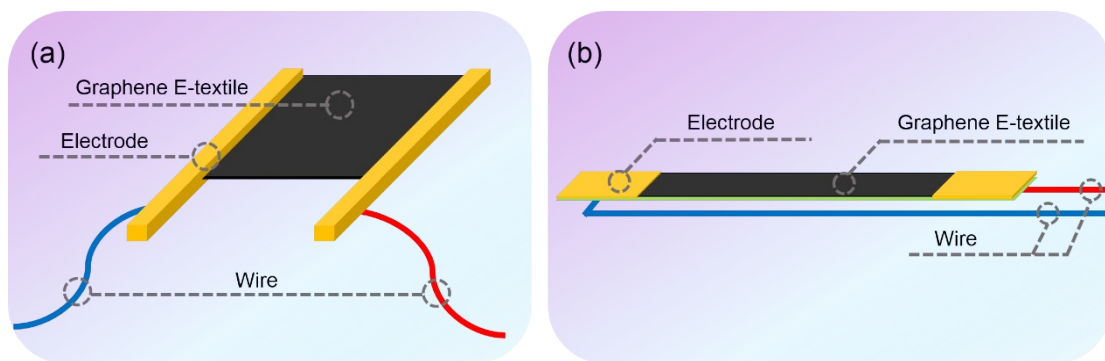

Fig. S19 (a) Schematic diagram of the pressure sensor and strain sensor. (b) Schematic diagram of a bending sensor.

**Table S1. Comparison of the sensitivity, detection limit, and response time of our wearable pressure sensor with that in the literature.**

| Active materials                         | Working mechanism        | Pressure range     | Sensitivity                                                                                                   | Response time [ms] | Wearable condition           | Ref.     |
|------------------------------------------|--------------------------|--------------------|---------------------------------------------------------------------------------------------------------------|--------------------|------------------------------|----------|
| Silver NWs                               | Positive resistance type | 13 Pa to 50 kPa    | 1.14 kPa <sup>-1</sup>                                                                                        | ≈17                | Non-breathable, not washable | 1        |
| Au-coated PDMS micropillar/polyaniline   | Positive resistance type | 15 Pa to 3.5 kPa   | 2.0 kPa <sup>-1</sup> below 0.22 kPa, 0.87 kPa <sup>-1</sup> at 0.22–1.0 kPa                                  | ≈50                | Non-breathable, not washable | 2        |
| SWCNT film/micropatterned PDMS           | Positive resistance type | 0.6 Pa to 1.2 kPa  | 1.8 kPa <sup>-1</sup> below 0.3 kPa                                                                           | <10                | Non-breathable, not washable | 3        |
| CNT–PDMS composite with microdome arrays | Positive resistance type | 0.2 Pa to 59 kPa   | 15.1 kPa <sup>-1</sup> below 0.5 kPa                                                                          | 40                 | Non-breathable, not washable | 4        |
| Hierarchically structured graphene       | Positive resistance type | 1 Pa to 12 kPa     | 8.5 kPa <sup>-1</sup>                                                                                         | 40                 | Non-breathable, not washable | 5        |
| Fingerprint-like 3D graphene film        | Positive resistance type | 0.2 Pa to 75 kPa   | 110 kPa <sup>-1</sup> below 200 Pa, 3 kPa <sup>-1</sup> at 0.2–15 kPa,<br>0.26 kPa <sup>-1</sup> at 15–75 kPa | 30                 | Non-breathable, not washable | 6        |
| CNT–graphene composite film              | Positive resistance type | 0.6 Pa to 6 kPa    | 19.8 kPa <sup>-1</sup> below 0.3 kPa,<br>0.27 kPa <sup>-1</sup> above 0.3 kPa                                 | 16.7               | Non-breathable, not washable | 7        |
| rGO-coated PU foam                       | Positive resistance type | <10 kPa            | 0.26 kPa <sup>-1</sup> below 2 kPa, 0.03 kPa <sup>-1</sup> at 2–10 kPa                                        | –                  | Non-breathable, not washable | 8        |
| CNT-coated textile/Ni-coated textile     | Positive resistance type | 6 Pa to 20 kPa     | 14.4 kPa <sup>-1</sup> below 3.5 kPa, 7.8 kPa <sup>-1</sup> at 3.5–15 kPa                                     | ≈24                | Non-breathable, not washable | 9        |
| 3D carbonized cotton sponge              | Positive resistance type | <700 kPa           | Maximum 6.04 kPa <sup>-1</sup>                                                                                | –                  | Non-breathable, not washable | 10       |
| Carbonized silk nanofiber membrane       | Positive resistance type | 0.8 Pa to 5 kPa    | 34.47 kPa <sup>-1</sup> at 0.8–400 Pa, 1.16 kPa <sup>-1</sup> at 0.4–5 kPa                                    | ≈16.7              | Non-breathable, not washable | 11       |
| Graphene E-textile                       | Positive resistance type | 1.5 Pa to 17.5 kPa | Maximum 18.56 kPa <sup>-1</sup>                                                                               | 23 ms              | Breathable and washable      | Our work |

**Table S2. Comparison of the performance of our wearable strain sensor with that in the literature.**

| Materials                       | Working mechanism        | Strain range | Sensitivity [GF]                                                                                                     | Wearable condition           | RefM     |
|---------------------------------|--------------------------|--------------|----------------------------------------------------------------------------------------------------------------------|------------------------------|----------|
| Silver NWs                      | Negative resistance type | <70%         | 2–14, tunable                                                                                                        | Non-breathable, not washable | 12       |
| Platinum NPs                    | Negative resistance type | <2%          | 16 000 at 2% strain                                                                                                  | Non-breathable, not washable | 13       |
| Aligned SWCNT films             | Negative resistance type | <280%        | 0.82, 0.06 within strain of 0–40%, 60–200%                                                                           | Non-breathable, not washable | 14       |
| Thickness-gradient CNT film     | Negative resistance type | <150%        | 161 within 2% strain; 9.8, 0.58 within strain of 2–15%, 15–150%                                                      | Non-breathable, not washable | 15       |
| Dry-spun CNT fiber              | Negative resistance type | <960%        | 0.54 within 400% strain; 64 within strain of 400–960%                                                                | Non-breathable, not washable | 16       |
| CNT–PDMS composite              | Negative resistance type | <120%        | 27.8, 1084, 9617 within strain of 0–40%, 40–90%, 90–120%                                                             | Non-breathable, not washable | 17       |
| Graphene mesh                   | Negative resistance type | <8%          | 500 within 2% strain; 10 000 at 8%                                                                                   | Non-breathable, not washable | 18       |
| Crumpled/wrinkled graphene film | Negative resistance type | <70%         | 0.76, 1.67, 2.55 at 10%, 40%, 70% strain                                                                             | Non-breathable, not washable | 19       |
| rGO-based fiber                 | Negative resistance type | 0.2–100%     | 10, 3.7 within 1%, 50% strain <100                                                                                   | Non-breathable, not washable | 20       |
| 3D graphene foam/CNT composite  | Negative resistance type | <85%         | 2.0, 20.5 at 5%, 85% strain                                                                                          | Non-breathable, not washable | 21       |
| Pencil-drawn graphite           | Negative resistance type | -0.62%–0.62% | 150.5, 60.6, 536.6 within strain of -0.62% to<br>-0.32%, -0.22 to 0.22%, 0.32–0.62%                                  | Non-breathable, not washable | 22       |
| Carbonized silk fabric          | Negative resistance type | <500%        | 9.6 within 250% strain, 37.5 within strain of 250–500% <70                                                           | Non-breathable, not washable | 23       |
| Graphene/Polydimethylsiloxane   | Negative resistance type | <20%         | -                                                                                                                    | Non-breathable, not washable | 24       |
| Graphene and Carbon Nanotube    | Negative resistance type | <20%         | -                                                                                                                    | Non-breathable, not washable | 25       |
| Graphene Textile                | Positive resistance type | <15%         | -26 in the strain range of 8% under y-direction stretching and<br>-1.7 in the strain range of 15% in the x-direction | Non-breathable, washable     | 26       |
| Graphene E-textile              | Positive resistance type | <22.5%       | -14.26 (Maximum)                                                                                                     | Breathable and washable      | Our work |

## References

- 1 S. Gong, W. Schwalb, Y. Wang, Y. Chen, Y. Tang, J. Si, B. Shirinzadeh, W. Cheng, *Nat. Commun.* 5 (2014) 3132-3140.
- 2 H. Park, Y. R. Jeong, J. Yun, S. Y. Hong, S. Jin, S. J. Lee, G. Zi, J. S. Ha, *ACS Nano* 9 (2015) 9974-9985.
- 3 X. Wang, Y. Gu, Z. Xiong, Z. Cui, T. Zhang, *Adv. Mater.* 26 (2014) 1336-1342.
- 4 J. Park, Y. Lee, J. Hong, M. Ha, Y. D. Jung, H. Lim, S. Y. Kim, H. Ko, *ACS Nano* 8 (2014) 4689-4697.
- 5 G. Y. Bae, S. W. Pak, D. Kim, G. Lee, D. H. Kim, Y. Chung, K. Cho, *Adv. Mater.* 28 (2016) 5300-5306.
- 6 K. Xia, C. Wang, M. Jian, Q. Wang, Y. Zhang, *Nano Res.* 11 (2018) 1124-1134.
- 7 M. Jian, K. Xia, Q. Wang, Z. Yin, H. Wang, C. Wang, H. Xie, M. Zhang, Y. Zhang, *Adv. Funct. Mater.* 27 (2017) 1606066.
- 8 H. B. Yao, J. Ge, C. F. Wang, X. Wang, W. Hu, Z. J. Zheng, Y. Ni, S. H. Yu, *Adv. Mater.* 25 (2013) 6692-6698.
- 9 M. Liu, X. Pu, C. Jiang, T. Liu, X. Huang, L. Chen, C. Du, J. Sun, W. Hu, Z. L. Wang, *Adv. Mater.* 29 (2017) 1703700.
- 10 Y. Li, Y. A. Samad, K. Liao, *J. Mater. Chem A* 3 (2015) 2181-2187.
- 11 Q. Wang, M. Jian, C. Wang, Y. Zhang, *Adv. Funct. Mater.* 27 (2017) 1605657.
- 12 M. Amjadi, A. Pichitpajongkit, S. Lee, S. Ryu, I. Park, *ACS Nano* 8 (2014) 5154-5163.
- 13 B. Park, J. Kim, D. Kang, C. Jeong, K. S. Kim, J. U. Kim, P. J. Yoo, T. I. Kim, *Adv. Mater.* 28 (2016) 8130-8137.
- 14 T. Yamada, Y. Hayamizu, Y. Yamamoto, Y. Yomogida, A. Izadi-Najafabadi, D. N. Futaba, K. Hata, *Nat. Nanotechnol.* 6 (2011) 296.
- 15 Z. Liu, D. Qi, P. Guo, Y. Liu, B. Zhu, H. Yang, Y. Liu, B. Li, C. Zhang, J. Yu, *Adv. Mater.*, 27 (2015) 6230-6237.
- 16 S. Ryu, P. Lee, J. B. Chou, R. Xu, R. Zhao, A. J. Hart, S. G. Kim, *ACS Nano* 9 (2015) 5929-5936.



- 17 J. Park, Y. Lee, J. Hong, Y. Lee, M. Ha, Y. Jung, H. Lim, S. Y. Kim, H. Ko, *ACS Nano* 8 (2014) 12020-12029.
- 18 Y. Wang, L. Wang, T. Yang, X. Li, X. Zang, M. Zhu, K. Wang, D. Wu, H. Zhu, *Funct. Mater.* 24 (2014) 4666-4670.
- 19 T. Yang, X. Jiang, Y. Zhong, X. Zhao, S. Lin, J. Li, X. Li, J. Xu, Z. Li, H. Zhu, *ACS Sens.* 2 (2017) 967-974.
- 20 Y. Cheng, R. Wang, J. Sun, L. Gao, *Adv. Mater.* 27 (2015) 7365-7371.
- 21 Q. Liu, J. Chen, Y. Li, G. Shi, *ACS Nano* 10 (2016) 7901-7906.
- 22 X. Liao, Q. Liao, X. Yan, Q. Liang, H. Si, M. Li, H. Wu, S. Cao, Y. Zhang, *Adv. Funct. Mater.* 25 (2015) 2395-2401.
- 23 C. Wang, X. Li, E. Gao, M. Jian, K. Xia, Q. Wang, Z. Xu, T. Ren, Y. Zhang, *Adv. Mater.* 28 (2016) 6640-6648.
- 24 Z. Wang, W. Gao, Q. Zhang, K. Zheng, J. Xu, W. Xu, E. Shang, J. Jiang, J. Zhang, Y. Liu, *ACS Appl. Mater. Interfaces* 11 (2018) 1344-1352.
- 25 J. Shi, X. Li, H. Cheng, Z. Liu, L. Zhao, T. Yang, Z. Dai, Z. Cheng, E. Shi, L. Yang, Z. Zhang, A. Cao, H. Zhu, Y. Fang, *Adv. Funct. Mater.* 26 (2016) 2078-2084.
- 26 Z. Yang, Y. Pang, X. l. Han, Y. Yang, J. Ling, M. Jian, Y. Zhang, Y. Yang, T. L. Ren, *ACS Nano* 12 (2018) 9134-9141.
